# Supplementary material for: Halogen atom effect of fluorinated tolanes on their luminescence characteristics
Source: Royal Society of Chemistry journal article supplement (doi:10.1039/d1nj05539a), 2022-01-01
Supplement: d1nj05539a1.pdf [file d1nj05539a1.pdf]

# ***Supporting Information***

## *Halogen atom effect of fluorinated tolanes on their luminescence characteristics*

Masato Morita, Shigeyuki Yamada,\* and Tsutomu Konno

Faculty of Molecular Chemistry and Engineering, Kyoto Institute of Technology,  
Matsugasaki, Sakyo-ku, Kyoto 606-8585, Japan.  
E-mail: syamada@kit.ac.jp

## Contents

|                                                                                  |      |
|----------------------------------------------------------------------------------|------|
| 1. $^1\text{H}$ -, $^{19}\text{F}$ -, $^{13}\text{C}$ -NMR, and IR spectra _____ | S-3  |
| 2. Crystallographic data _____                                                   | S-9  |
| 3. Absorption, PL, and PL decay spectra in toluene _____                         | S-10 |
| 4. Absorption, PL, and PL decay spectra in various solvents _____                | S-11 |
| 5. PL and PL decay spectra of crystal _____                                      | S-15 |
| 6. PL and PL decay spectra of <b>4F-I</b> in polymer matrix _____                | S-16 |
| 7. Quantum chemical calculation _____                                            | S-17 |



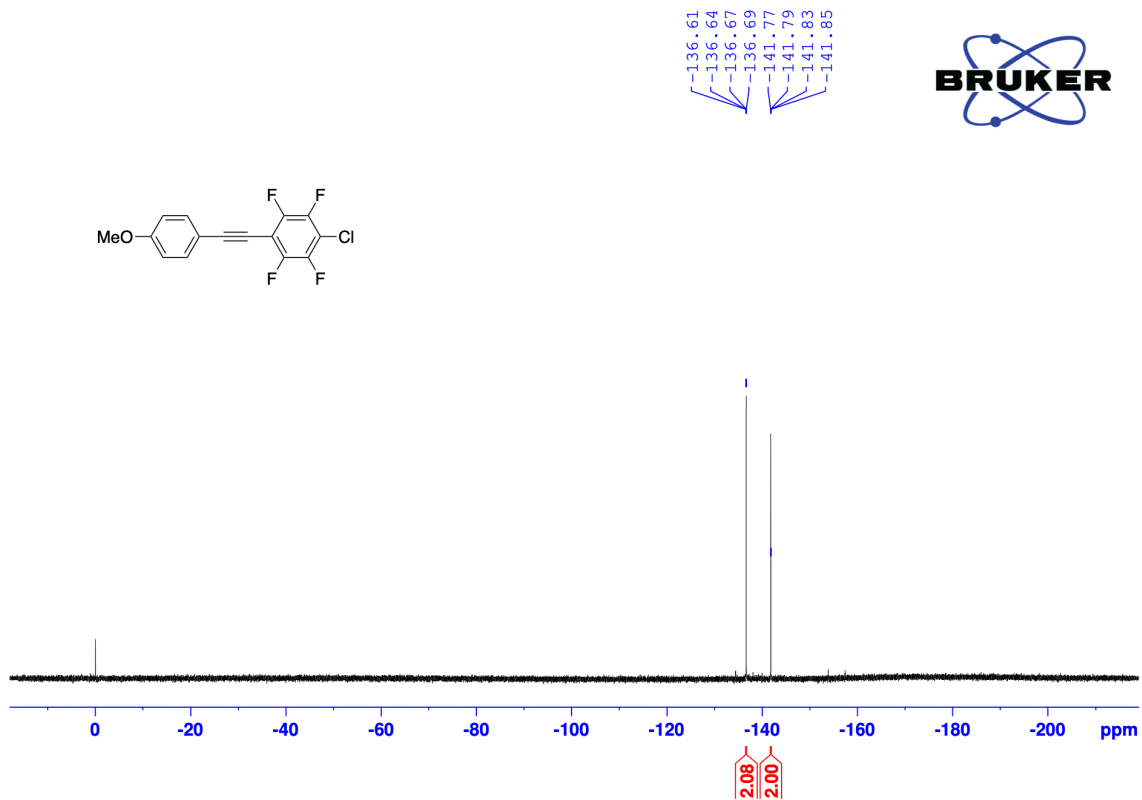

Figure S3 <sup>19</sup>F NMR spectrum of 4F-Cl.

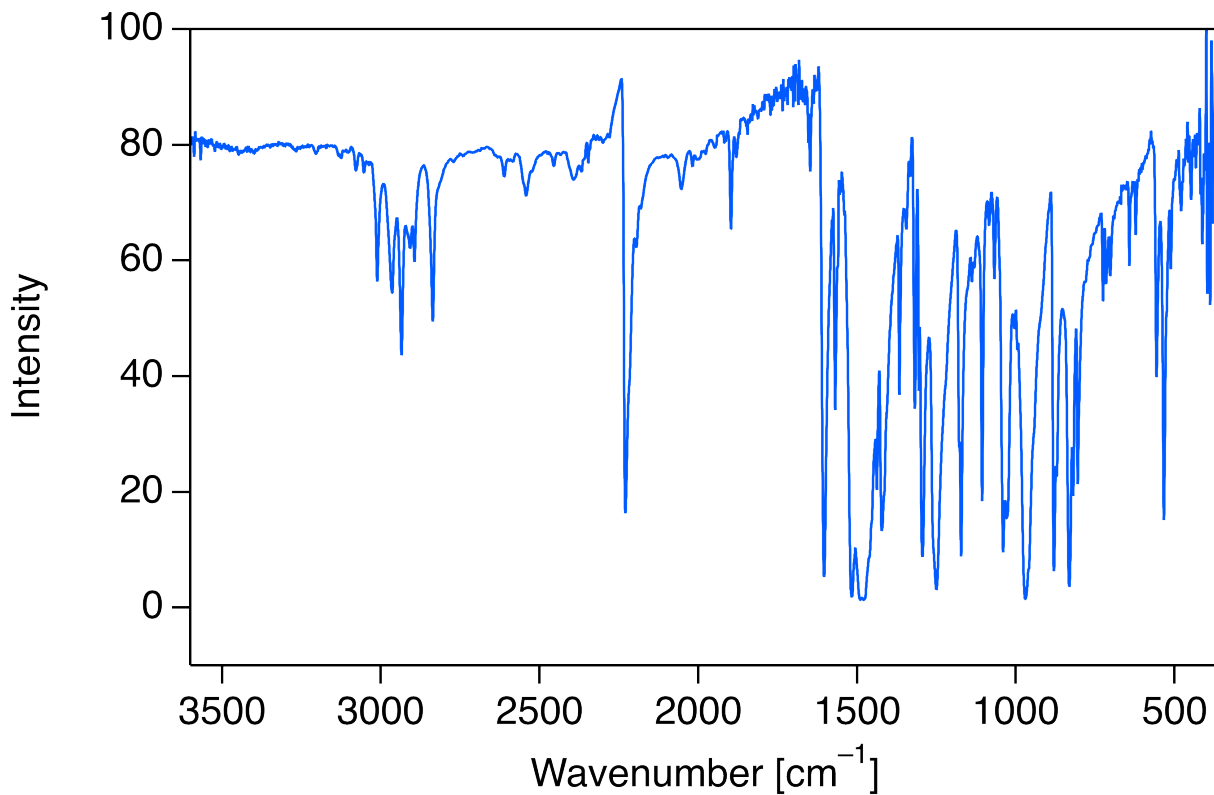

Figure S4 IR spectrum of 4F-Cl.

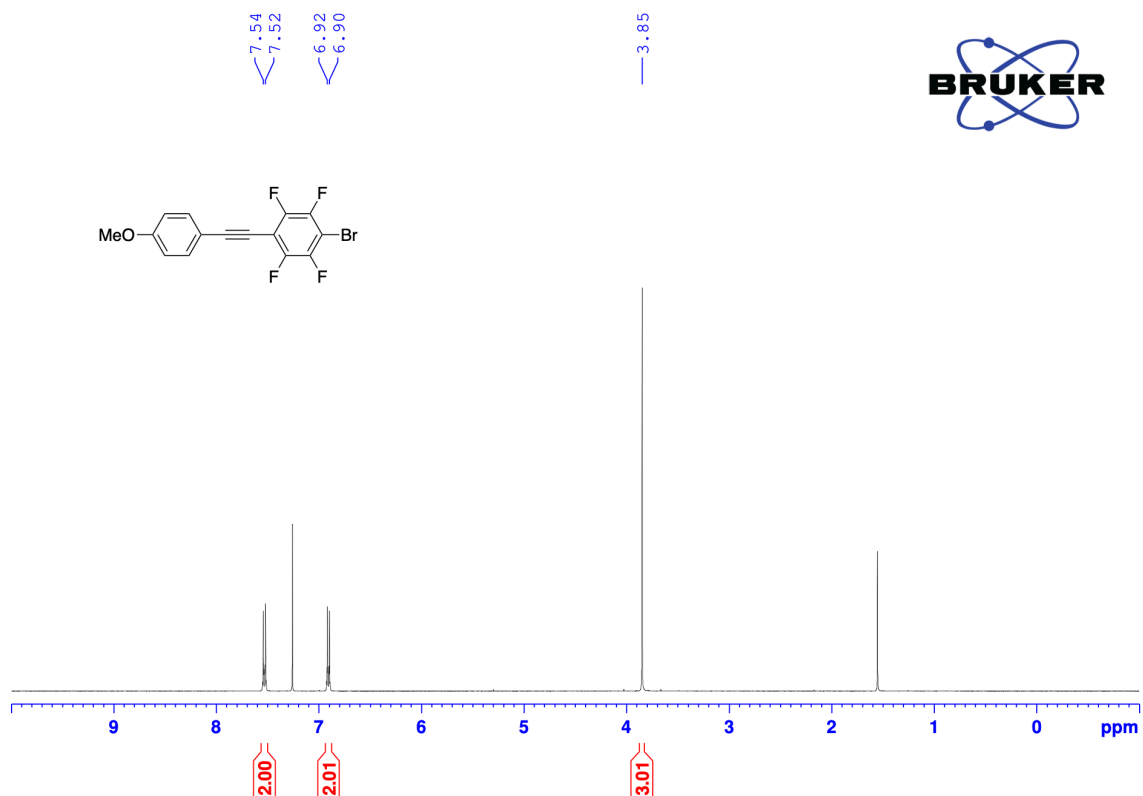

Figure S5 <sup>1</sup>H NMR spectrum of 4F-Br.

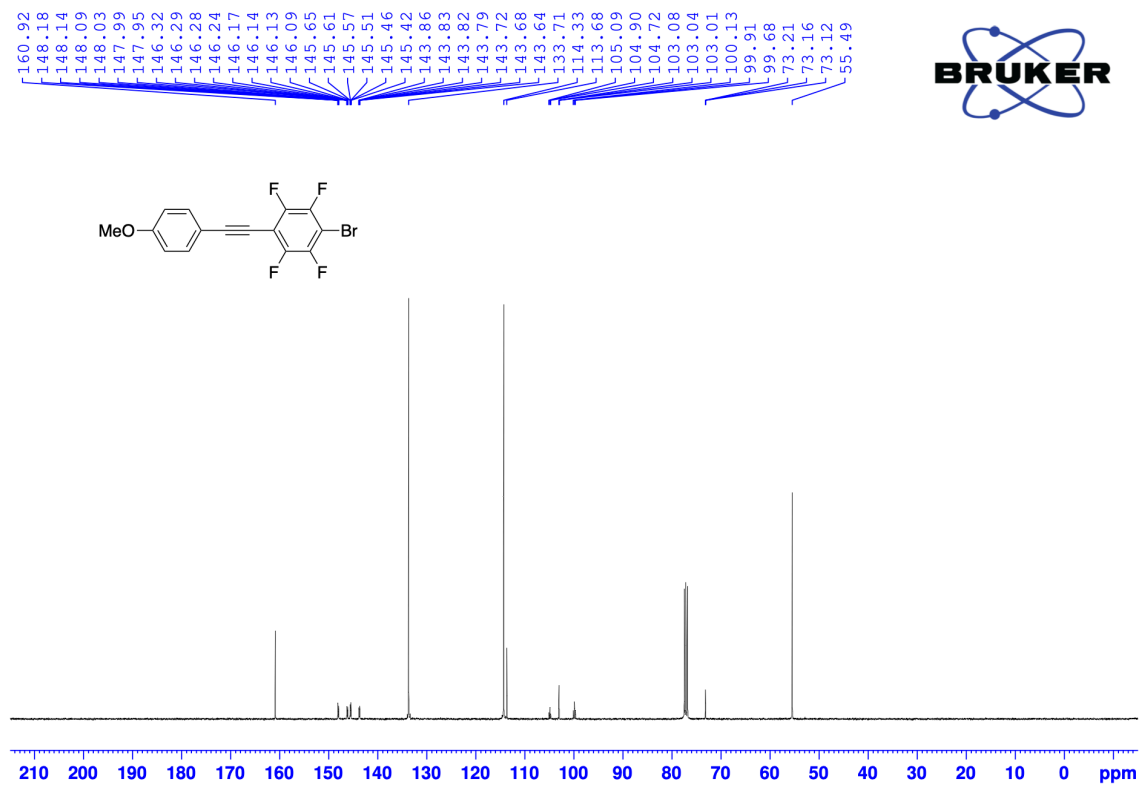

Figure S6 <sup>13</sup>C NMR spectrum of 4F-Br.

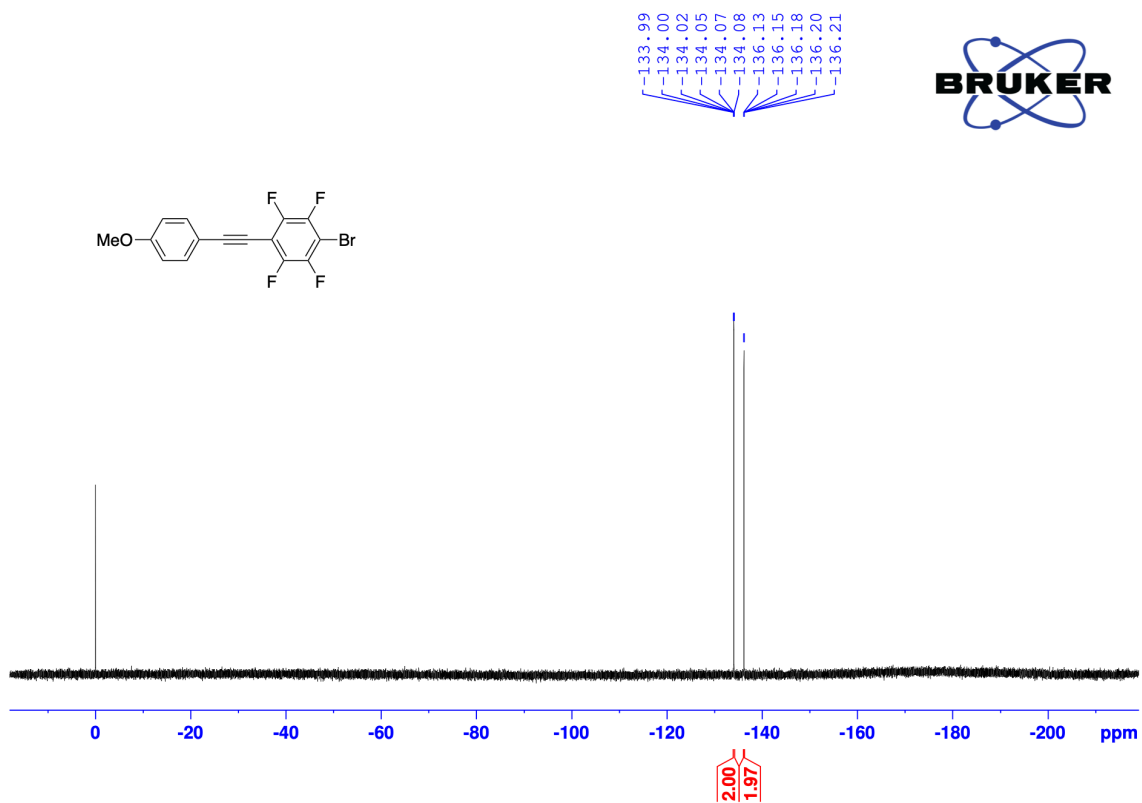

Figure S7 <sup>19</sup>F NMR spectrum of 4F-Br.

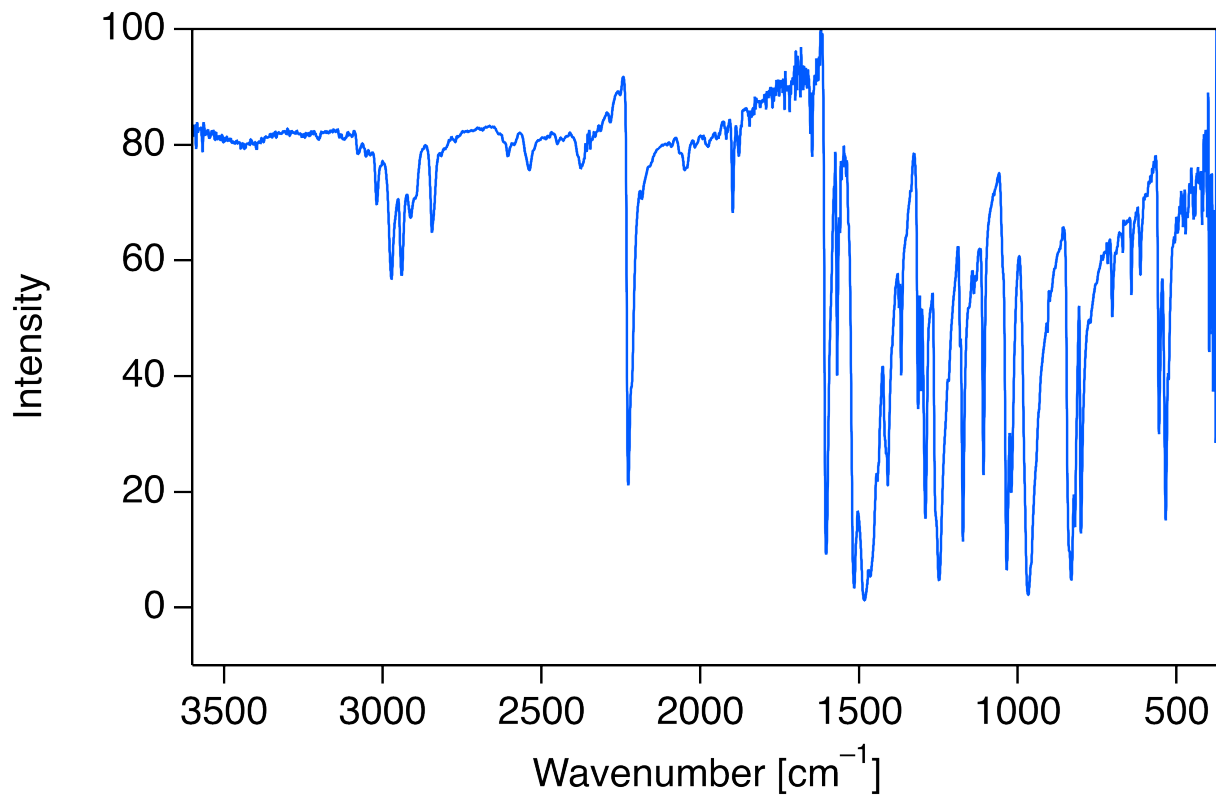

Figure S8 IR spectrum of 4F-Br.



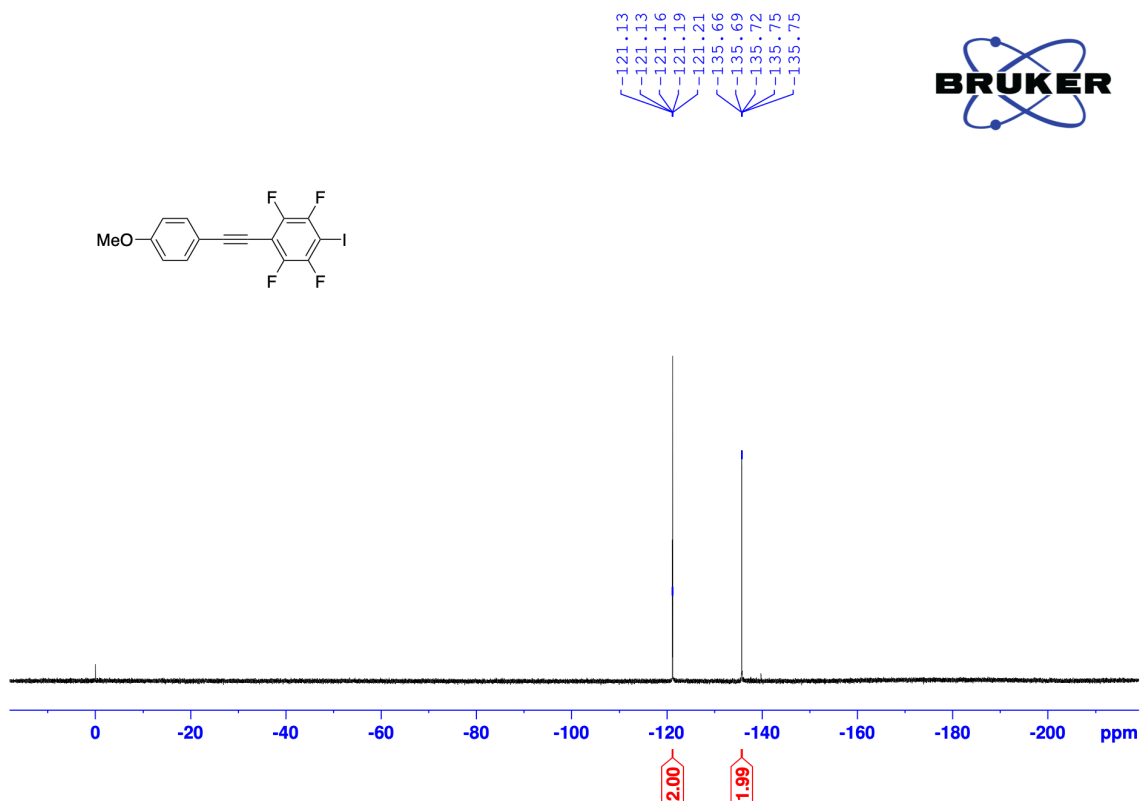

Figure S11 <sup>19</sup>F NMR spectrum of 4F-I.

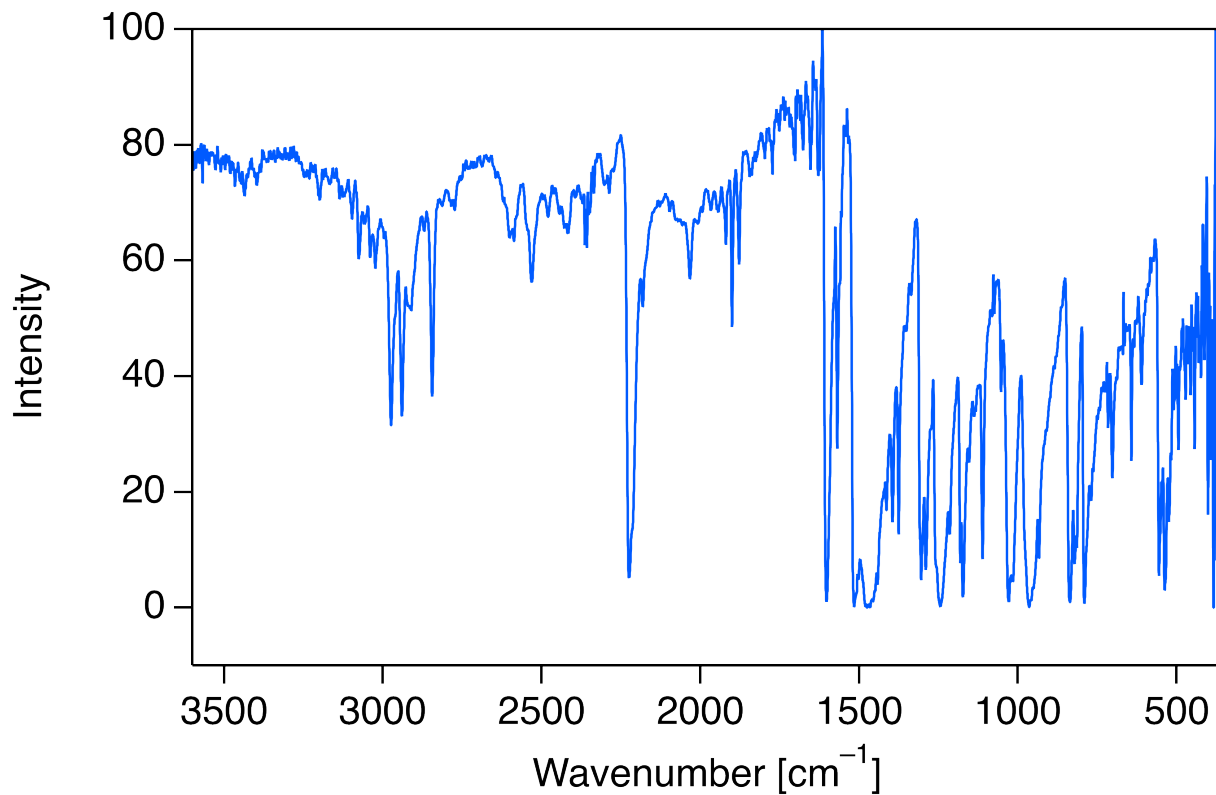

Figure S12 IR spectrum of 4F-I.



## 2. Crystallographic data

**Table S1** Crystallographic data of **4F-Cl**, **4F-Br**, and **4F-I**.

|                                    | <b>4F-Cl</b>                                      | <b>4F-Br</b>                                      | <b>4F-I</b>                                      |
|------------------------------------|---------------------------------------------------|---------------------------------------------------|--------------------------------------------------|
| CCDC #                             | 2116928                                           | 2116929                                           | 2116930                                          |
| Empirical Formula                  | C <sub>15</sub> H <sub>7</sub> ClF <sub>4</sub> O | C <sub>15</sub> H <sub>7</sub> BrF <sub>4</sub> O | C <sub>15</sub> H <sub>7</sub> F <sub>4</sub> IO |
| Formula weight                     | 314.66                                            | 359.11                                            | 406.11                                           |
| Temperature [K]                    | 299                                               | 293                                               | 293                                              |
| Crystal Color / Habit              | Colourless / Plate                                | Colourless / Block                                | Colourless / Block                               |
| Crystal Size [mm]                  | 0.418 × 0.305 × 0.081                             | 0.687 × 0.390 × 0.156                             | 0.619 × 0.538 × 0.096                            |
| Crystal System                     | triclinic                                         | monoclinic                                        | orthorhombic                                     |
| Space Group                        | <i>P</i> -1                                       | <i>P</i> 2 <sub>1</sub> / <i>c</i>                | <i>Pbca</i>                                      |
| <i>a</i> [Å]                       | 6.2618(3)                                         | 7.5810(5)                                         | 16.2038(6)                                       |
| <i>b</i> [Å]                       | 7.4426(3)                                         | 28.9757(12)                                       | 6.1025(2)                                        |
| <i>c</i> [Å]                       | 29.3159(10)                                       | 6.4309(4)                                         | 28.4996(10)                                      |
| $\alpha$ [°]                       | 90.733(3)                                         | 90                                                | 90                                               |
| $\beta$ [°]                        | 92.011(3)                                         | 100.322(7)                                        | 90                                               |
| $\gamma$ [°]                       | 97.051(4)                                         | 90                                                | 90                                               |
| <i>V</i> [Å <sup>3</sup> ]         | 1354.87(10)                                       | 1389.78(14)                                       | 2818.15(17)                                      |
| <i>Z</i>                           | 4                                                 | 4                                                 | 8                                                |
| $R_1$ [ $F^2 > 2\sigma(F^2)$ ] [a] | 0.0707                                            | 0.0471                                            | 0.0342                                           |
| $wR_2$ ( $F^2$ ) [b]               | 0.2402                                            | 0.1044                                            | 0.0983                                           |

[a]  $R_1 = \sum||F_o| - |F_c|| / \sum|F_o|$ . [b]  $wR_2 = \{[\sum w(|F_o| - |F_c|)] / \sum w|F_o|\}^{1/2}$ .

### 3. Absorption, PL, PL decay spectra in toluene

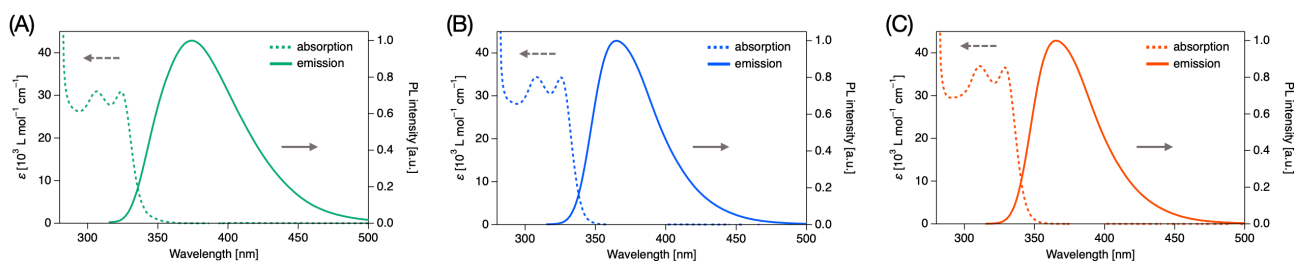

**Figure S13** Absorption (dotted line, left) and PL (solid line, right) spectra of (A) **4F-CI**, (B) **4F-Br**, and (C) **4F-I** in toluene excited at maximum absorption wavelength.

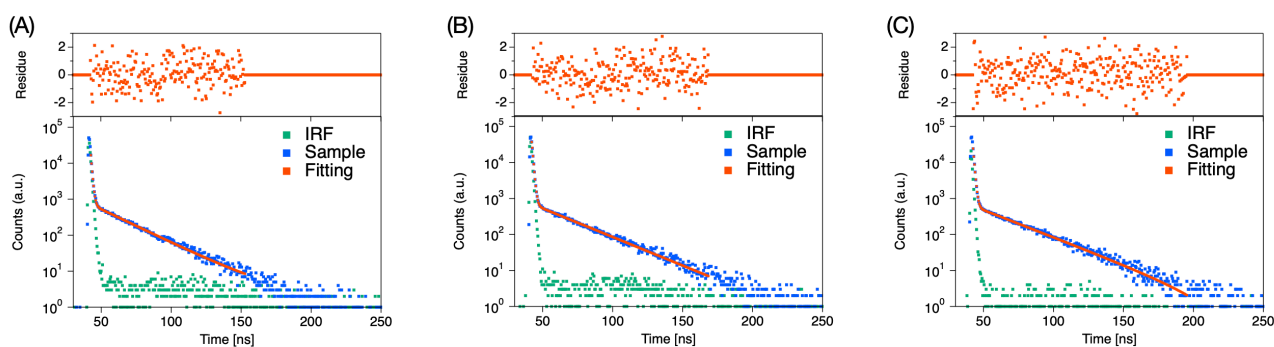

**Figure S14** PL decay profiles monitored at emission maxima of (A) **4F-CI**, (B) **4F-Br**, and (C) **4F-I** in toluene excited at 280 nm.

#### 4. Absorption, PL, and PL decay spectra of in various solvents

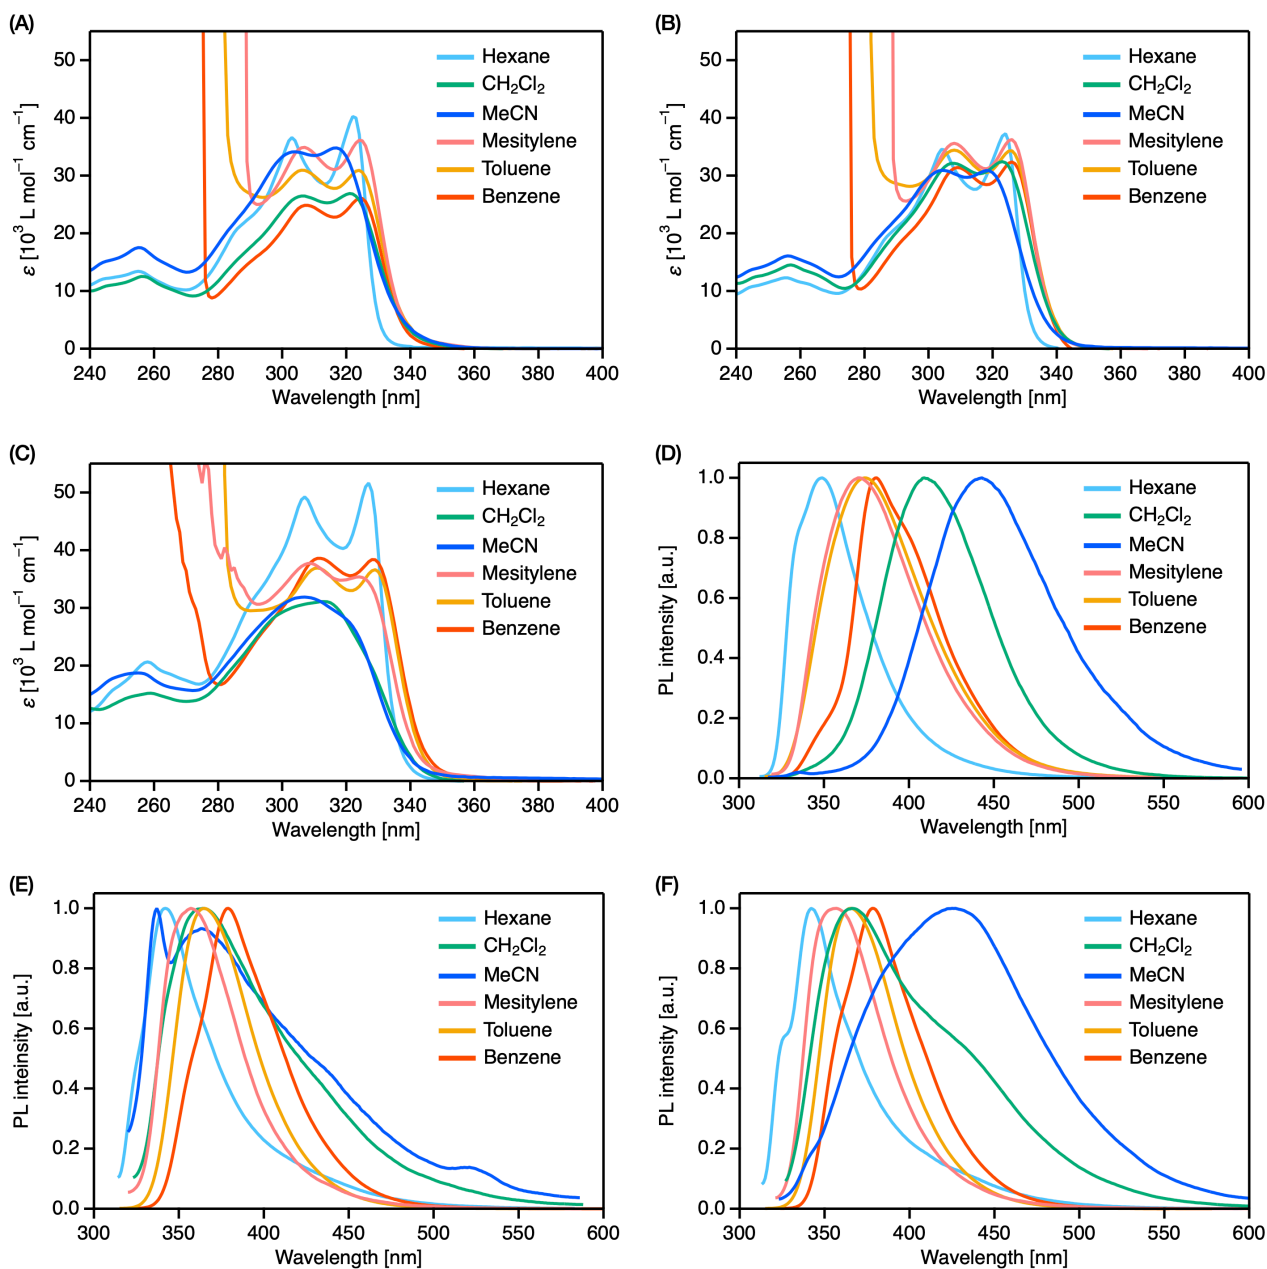

**Figure S15** Absorption spectra of (A) **4F-Cl**, (B) **4F-Br**, (C) **4F-I**, and PL spectra of (D) **4F-Cl**, (E) **4F-Br**, (F) **4F-I** excited at maximum absorption wavelength.

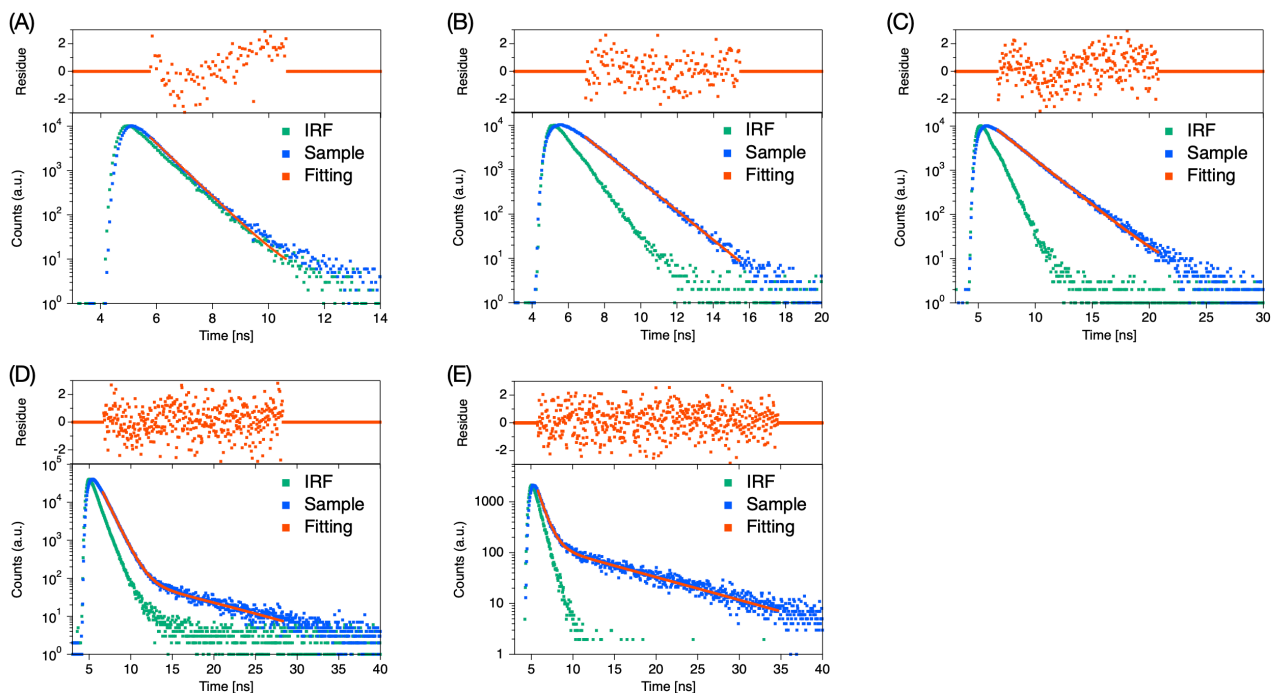

**Figure S16** PL decay profiles monitored at emission maxima of **4F-Cl** in (A) hexane, (B) dichloromethane, (C) acetonitrile, (D) benzene, (E) mesitylene excited at 280 nm.

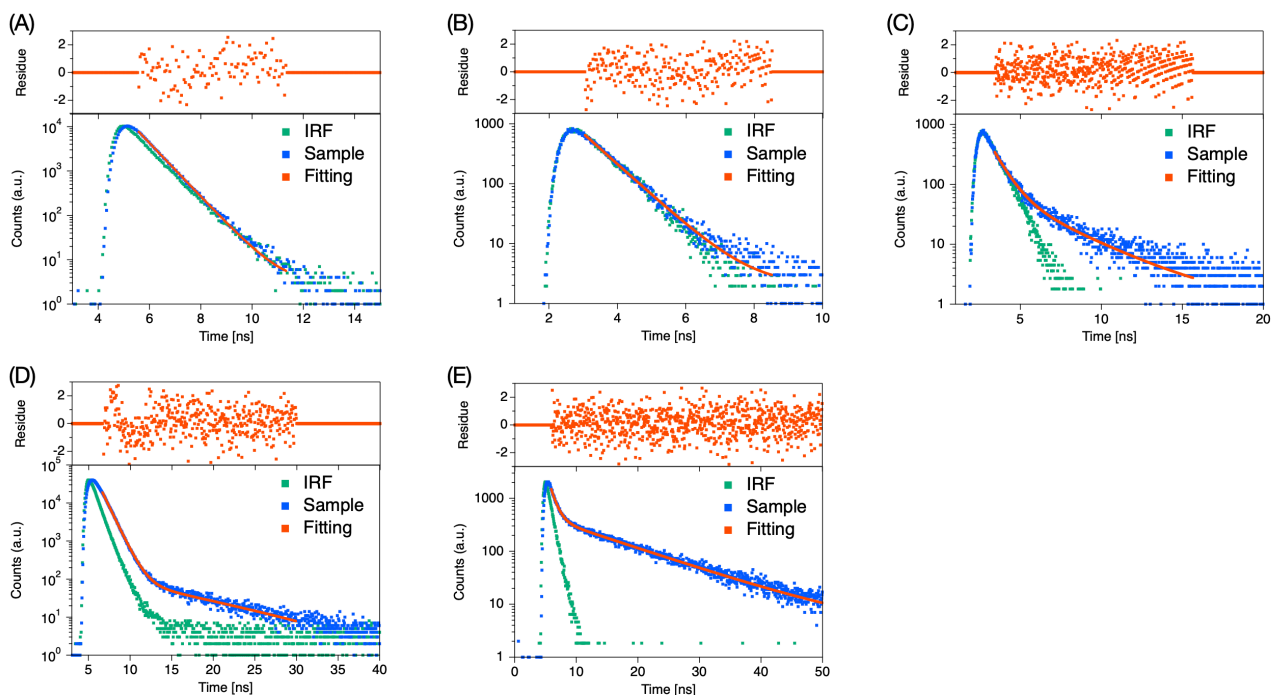

**Figure S17** PL decay profiles monitored at emission maxima of **4F-Br** in (A) hexane, (B) dichloromethane, (C) acetonitrile, (D) benzene, (E) mesitylene excited at 280 nm.

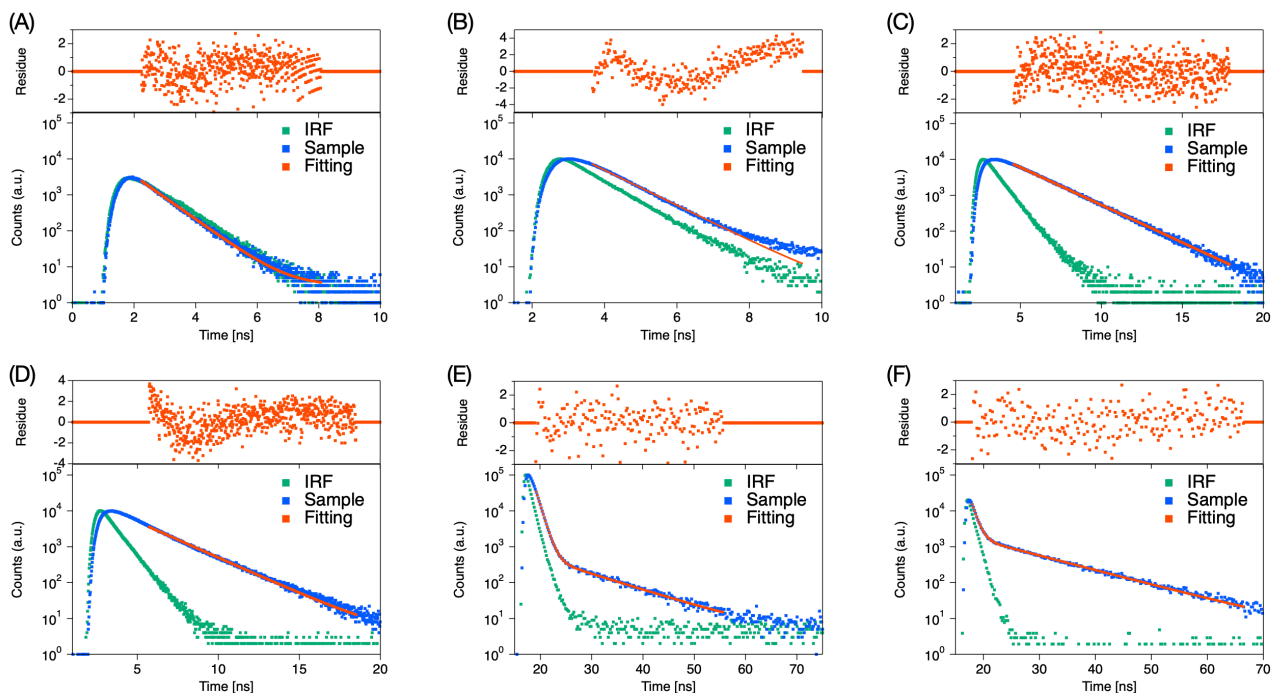

**Figure S18** PL decay profiles monitored at emission maxima of **4F-I** in (A) hexane, (B) THF, (C) dichloromethane, (D) acetonitrile, (E) benzene, (F) mesitylene excited at 280 nm.

**Table S2** Photophysical properties of **4F-CI** in various solvents.

| Solvents                        | $\lambda_{\max}$ [nm] ( $\epsilon$ [L mol <sup>-1</sup> cm <sup>-1</sup> ]) | $\lambda_{\text{PL}}$ [nm] | $\Phi_{\text{PL}}$ | $\tau_1$ [ns] | $\tau_2$ [ns] |
|---------------------------------|-----------------------------------------------------------------------------|----------------------------|--------------------|---------------|---------------|
| Hexane                          | 303(36600), 322(40200)                                                      | 349                        | 0.10               | <1.0          | -             |
| CH <sub>2</sub> Cl <sub>2</sub> | 307(26500), 321(26900)                                                      | 409                        | 0.05               | 1.3           | -             |
| MeCN                            | 304(34100), 317(34800)                                                      | 443                        | 0.05               | 2.1           | -             |
| Mesitylene                      | 307(34900), 324(36100)                                                      | 370                        | 0.14               | <1.0          | 9.7           |
| Toluene                         | 306(30900), 324(30900)                                                      | 374                        | 0.15               | <1.0          | 23.4          |
| Benzene                         | 308(24800), 324(26100)                                                      | 381                        | 0.31               | <1.0          | 8.0           |

**Table S3** Photophysical properties of **4F-Br** in various solvents.

| Solvents                        | $\lambda_{\max}$ [nm] ( $\epsilon$ [L mol <sup>-1</sup> cm <sup>-1</sup> ]) | $\lambda_{\text{PL}}$ [nm] | $\Phi_{\text{PL}}$ | $\tau_1$ [ns] | $\tau_2$ [ns] |
|---------------------------------|-----------------------------------------------------------------------------|----------------------------|--------------------|---------------|---------------|
| Hexane                          | 304(34500), 324(37300)                                                      | 342                        | 0.01               | <1.0          | -             |
| CH <sub>2</sub> Cl <sub>2</sub> | 308(32100), 323(32400)                                                      | 364                        | 0.01               | <1.0          | -             |
| MeCN                            | 304(30900), 318(30900)                                                      | 337                        | 0.01               | <1.0          | 3.3           |
| Mesitylene                      | 308(35600), 326(36200)                                                      | 357                        | 0.02               | <1.0          | 11.2          |
| Toluene                         | 308(34400), 326(34300)                                                      | 365                        | 0.45               | <1.0          | 23.4          |
| Benzene                         | 309(31400), 326(32400)                                                      | 379                        | 0.21               | <1.0          | 9.5           |

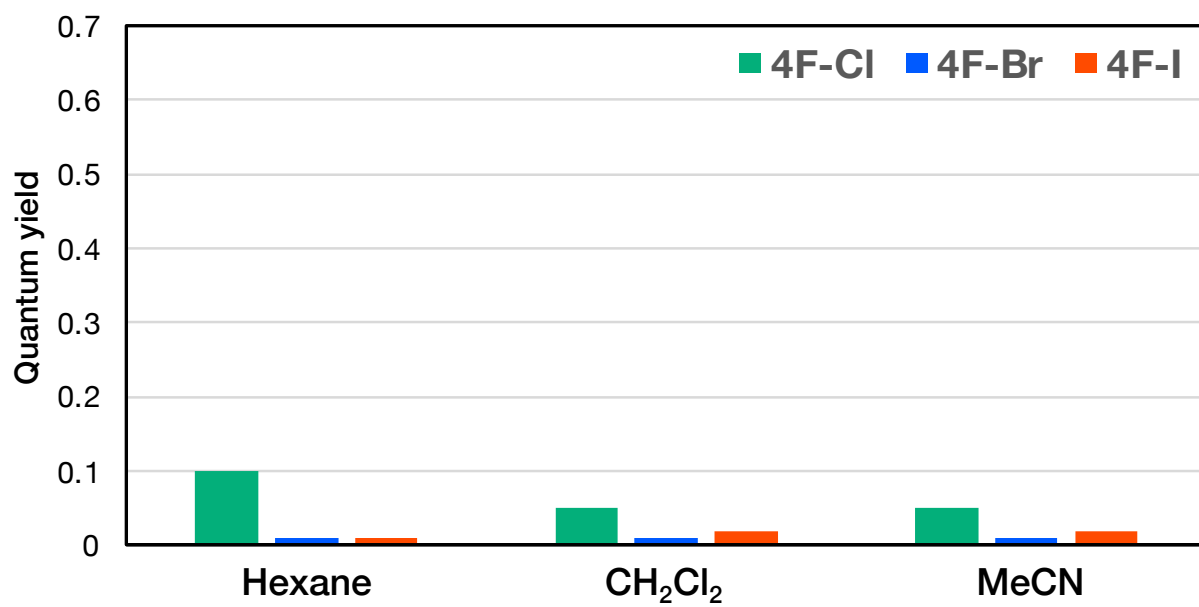

**Figure S19** Relationship between solvents and quantum yields.

## 5. PL and PL decay spectra of crystal

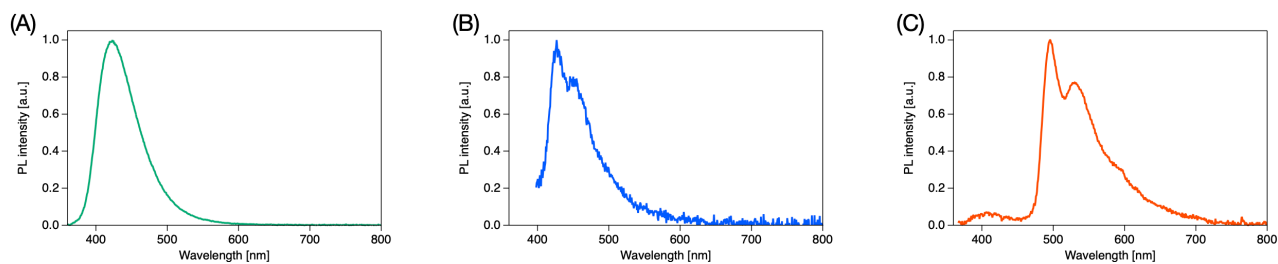

**Figure S20** PL spectra of (A) 4F-CI, (B) 4F-Br, and (C) 4F-I in crystal excited at 330 nm (4F-CI), 390 nm (4F-Br), 350 nm (4F-I).

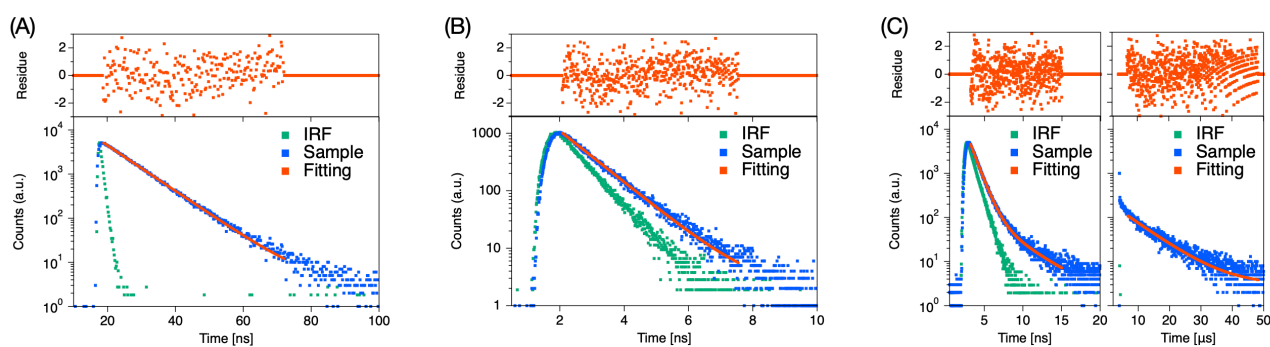

**Figure S21** PL decay profiles monitored at emission maxima of (A) 4F-CI, (B) 4F-Br, (C) 4F-CI (monitored wavelength, left; 406 nm, right; 495 nm) excited at 280 nm.

## 6. PL and PL decay spectra of 4F-I in polymer matrix

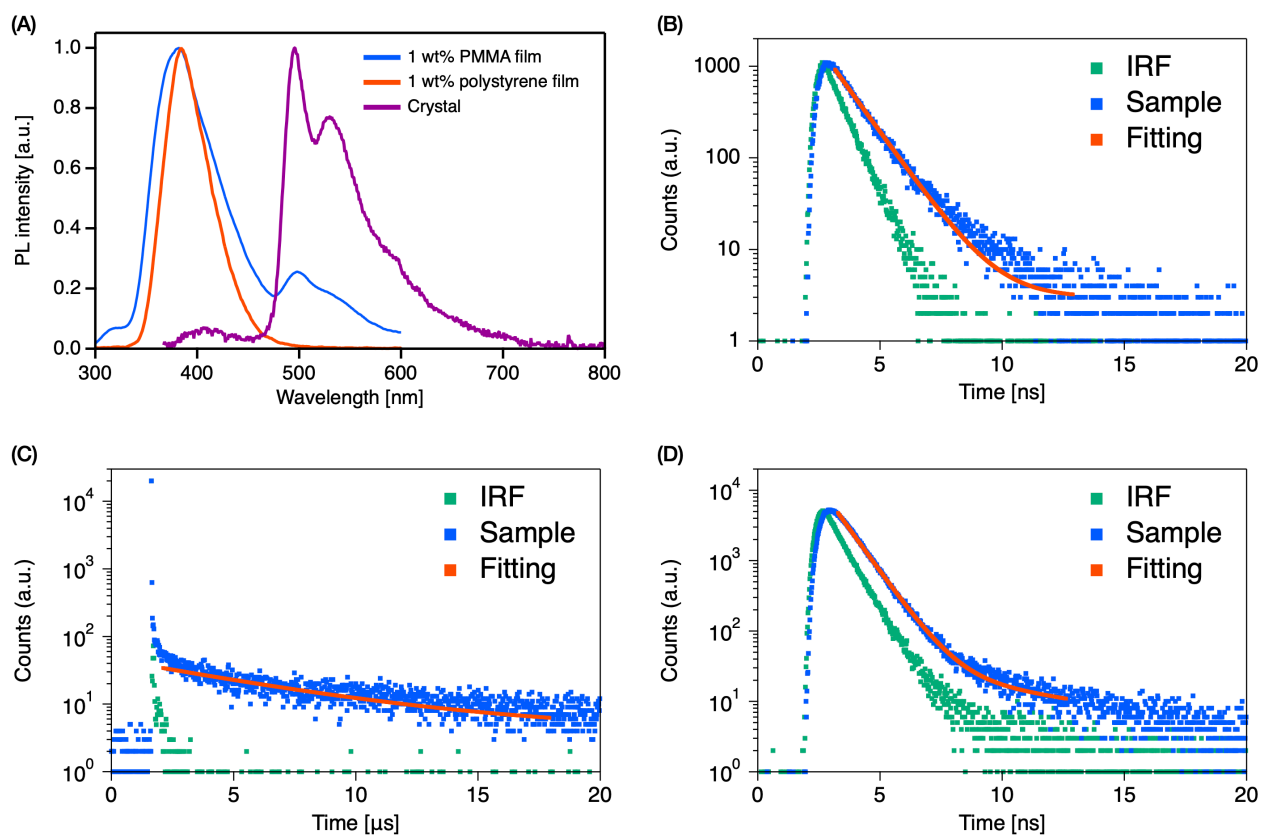

**Figure S22** (A) PL spectra of **4F-I** dispersed in PMMA or polystyrene matrix, PL decay profiles in (B) PMMA (monitored at 382 nm), (C) PMMA (monitored at 498 nm), (D) polystyrene (monitored at 384 nm) excited at 280 nm.

**Table S4** Photophysical properties of **4F-I** in polymer matrix.

| Polymer matrix | $\lambda_{PL}$ [nm] | $\Phi_{PL}$ | Fluorescence  |               | Phosphorescence          |
|----------------|---------------------|-------------|---------------|---------------|--------------------------|
|                |                     |             | $\tau_1$ [ns] | $\tau_2$ [ns] | $\tau_{phos}$ [ $\mu$ s] |
| PMMA           | 382, 498            | 0.01        | 1.2           | -             | 6.1                      |
| Polystyrene    | 384                 | 0.05        | <1.0          | 10.2          | -                        |



## 7. Quantum chemical calculation

All computations were carried out using density functional theory (DFT) with the Gaussian 16 (Rev. B.01) package. Geometry optimizations of single molecule were executed using the M06-2X hybrid functional and 6-31+G(d) basis set with a CPCM for toluene. **4F** and benzene were optimized using the M06-2X hybrid functional and 6-31+G(d) basis set. Vertical excitations were also calculated using a TD-DFT method at the same level of theory.

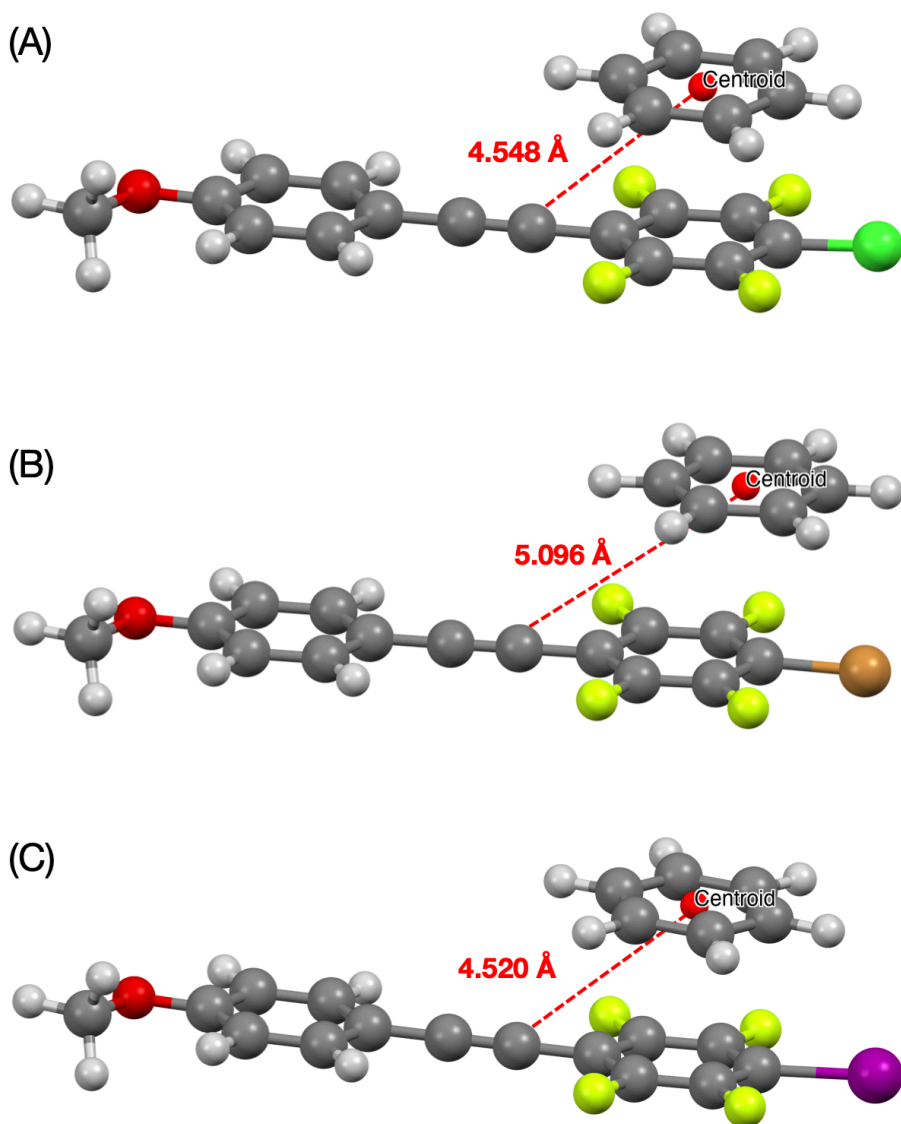

**Figure S23** Optimized structures and the distance between the carbon atom of alkyne and centroid of benzene (A) **4F-Cl**, (B) **4F-Br**, and (C) **4F-I**.

• Geometry optimization of 4F-Cl

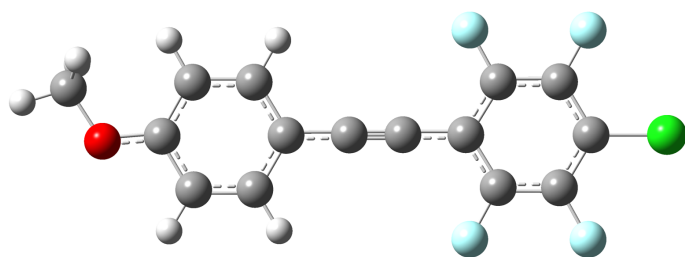

| Center Number | Atomic Number | Atomic Type | Coordinates (Angstroms) |           |           |
|---------------|---------------|-------------|-------------------------|-----------|-----------|
|               |               |             | X                       | Y         | Z         |
| 1             | 6             | 0           | -4.783881               | 1.416786  | -0.000002 |
| 2             | 6             | 0           | -3.402124               | 1.372237  | 0.000000  |
| 3             | 6             | 0           | -2.728619               | 0.135734  | 0.000002  |
| 4             | 6             | 0           | -3.480064               | -1.045249 | 0.000004  |
| 5             | 6             | 0           | -4.871904               | -1.008326 | 0.000002  |
| 6             | 6             | 0           | -5.528129               | 0.227245  | 0.000000  |
| 7             | 1             | 0           | -5.315829               | 2.362720  | -0.000004 |
| 8             | 1             | 0           | -2.827700               | 2.293363  | -0.000002 |
| 9             | 1             | 0           | -2.969004               | -2.003100 | 0.000006  |
| 10            | 1             | 0           | -5.426259               | -1.939266 | 0.000003  |
| 11            | 6             | 0           | -1.300572               | 0.088674  | 0.000003  |
| 12            | 6             | 0           | -0.088801               | 0.052197  | 0.000002  |
| 13            | 6             | 0           | 1.331904                | 0.014894  | 0.000002  |
| 14            | 6             | 0           | 2.093444                | 1.188365  | -0.000002 |
| 15            | 6             | 0           | 2.034245                | -1.194869 | 0.000004  |
| 16            | 6             | 0           | 3.478280                | 1.158092  | -0.000003 |
| 17            | 6             | 0           | 3.418964                | -1.233096 | 0.000002  |
| 18            | 6             | 0           | 4.161545                | -0.055200 | -0.000001 |
| 19            | 8             | 0           | -6.873545               | 0.375139  | -0.000002 |
| 20            | 6             | 0           | -7.673127               | -0.796099 | -0.000001 |
| 21            | 1             | 0           | -7.485795               | -1.397565 | -0.896212 |
| 22            | 1             | 0           | -7.485797               | -1.397562 | 0.896213  |
| 23            | 1             | 0           | -8.706226               | -0.451585 | -0.000002 |
| 24            | 9             | 0           | 1.481704                | 2.372616  | -0.000004 |
| 25            | 9             | 0           | 4.153720                | 2.306121  | -0.000007 |
| 26            | 9             | 0           | 1.364585                | -2.347462 | 0.000007  |
| 27            | 9             | 0           | 4.036817                | -2.413226 | 0.000004  |
| 28            | 17            | 0           | 5.876856                | -0.097580 | -0.000004 |

Excited State 1: Singlet-A 4.1041 eV 302.10 nm f=1.4614 <S\*\*2>=0.000  
HOMO -> LUMO 0.68706

• Geometry optimization of 4F-Br

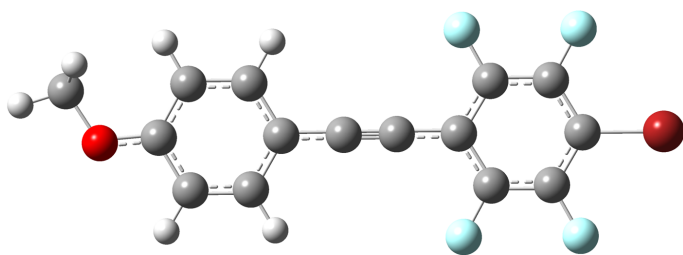

| Center Number | Atomic Number | Atomic Type | Coordinates (Angstroms) |           |           |
|---------------|---------------|-------------|-------------------------|-----------|-----------|
|               |               |             | X                       | Y         | Z         |
| 1             | 6             | 0           | 5.416364                | 1.409778  | 0.000001  |
| 2             | 6             | 0           | 4.034458                | 1.371068  | 0.000001  |
| 3             | 6             | 0           | 3.355890                | 0.137336  | -0.000001 |
| 4             | 6             | 0           | 4.102172                | -1.046856 | -0.000002 |
| 5             | 6             | 0           | 5.494047                | -1.015733 | -0.000002 |
| 6             | 6             | 0           | 6.155451                | 0.217046  | 0.000000  |
| 7             | 1             | 0           | 5.952401                | 2.353401  | 0.000002  |
| 8             | 1             | 0           | 3.463826                | 2.294545  | 0.000001  |
| 9             | 1             | 0           | 3.586981                | -2.002493 | -0.000003 |
| 10            | 1             | 0           | 6.044498                | -1.948980 | -0.000003 |
| 11            | 6             | 0           | 1.927977                | 0.096038  | 0.000000  |
| 12            | 6             | 0           | 0.716177                | 0.065189  | 0.000000  |
| 13            | 6             | 0           | -0.704018               | 0.031653  | 0.000001  |
| 14            | 6             | 0           | -1.461791               | 1.207266  | 0.000001  |
| 15            | 6             | 0           | -1.407239               | -1.177455 | 0.000001  |
| 16            | 6             | 0           | -2.846000               | 1.177639  | 0.000001  |
| 17            | 6             | 0           | -2.791362               | -1.211916 | 0.000002  |
| 18            | 6             | 0           | -3.529486               | -0.033403 | 0.000002  |
| 19            | 8             | 0           | 7.501499                | 0.358969  | 0.000000  |
| 20            | 6             | 0           | 8.295593                | -0.815987 | 0.000000  |
| 21            | 1             | 0           | 8.105429                | -1.416569 | 0.896207  |
| 22            | 1             | 0           | 8.105430                | -1.416567 | -0.896208 |
| 23            | 1             | 0           | 9.330296                | -0.476323 | 0.000001  |
| 24            | 9             | 0           | -0.845902               | 2.389243  | 0.000000  |
| 25            | 9             | 0           | -3.517698               | 2.328359  | 0.000000  |
| 26            | 9             | 0           | -0.737728               | -2.330118 | -0.000001 |
| 27            | 9             | 0           | -3.409532               | -2.392228 | 0.000001  |
| 28            | 35            | 0           | -5.387214               | -0.076744 | -0.000001 |

Excited State 1: Singlet-A 4.0786 eV 303.99 nm f=1.5260 <S\*\*2>=0.000  
HOMO -> LUMO 0.68703

• Geometry optimization of 4F-I

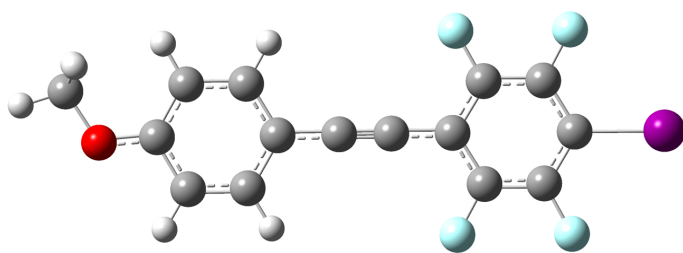

| Center Number | Atomic Number | Atomic Type | Coordinates (Angstroms) |           |           |
|---------------|---------------|-------------|-------------------------|-----------|-----------|
|               |               |             | X                       | Y         | Z         |
| 1             | 6             | 0           | -5.985729               | 1.404338  | -0.000010 |
| 2             | 6             | 0           | -4.603533               | 1.369011  | -0.000010 |
| 3             | 6             | 0           | -3.921645               | 0.137010  | -0.000003 |
| 4             | 6             | 0           | -4.665402               | -1.048962 | 0.000005  |
| 5             | 6             | 0           | -6.057592               | -1.021344 | 0.000005  |
| 6             | 6             | 0           | -6.722201               | 0.209852  | -0.000003 |
| 7             | 1             | 0           | -6.523884               | 2.346616  | -0.000016 |
| 8             | 1             | 0           | -4.035348               | 2.293850  | -0.000015 |
| 9             | 1             | 0           | -4.148001               | -2.003265 | 0.000012  |
| 10            | 1             | 0           | -6.605499               | -1.955967 | 0.000011  |
| 11            | 6             | 0           | -2.493611               | 0.099067  | 0.000001  |
| 12            | 6             | 0           | -1.281686               | 0.069757  | 0.000005  |
| 13            | 6             | 0           | 0.138880                | 0.039234  | -0.000001 |
| 14            | 6             | 0           | 0.895649                | 1.215226  | 0.000005  |
| 15            | 6             | 0           | 0.847106                | -1.166572 | -0.000005 |
| 16            | 6             | 0           | 2.281165                | 1.186875  | 0.000005  |
| 17            | 6             | 0           | 2.232682                | -1.194579 | -0.000005 |
| 18            | 6             | 0           | 2.974090                | -0.018424 | 0.000000  |
| 19            | 8             | 0           | -8.068405               | 0.348586  | -0.000003 |
| 20            | 6             | 0           | -8.859641               | -0.827800 | 0.000010  |
| 21            | 1             | 0           | -8.668227               | -1.428232 | -0.896088 |
| 22            | 1             | 0           | -8.668218               | -1.428218 | 0.896115  |
| 23            | 1             | 0           | -9.895242               | -0.490833 | 0.000012  |
| 24            | 9             | 0           | 0.278716                | 2.397132  | 0.000011  |
| 25            | 9             | 0           | 2.939574                | 2.347518  | 0.000010  |
| 26            | 9             | 0           | 0.182557                | -2.322508 | -0.000008 |
| 27            | 9             | 0           | 2.843267                | -2.381234 | -0.000009 |
| 28            | 53            | 0           | 5.060820                | -0.060508 | -0.000001 |

Excited State 1: Singlet-A 4.0848 eV 303.52 nm f=1.5789 <S\*\*2>=0.000  
HOMO -> LUMO 0.68784

• Geometry optimization of 4F-Cl and benzene

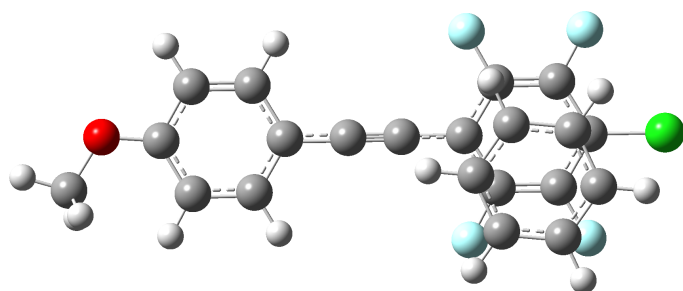

| Center Number | Atomic Number | Atomic Type | Coordinates (Angstroms) |           |           |
|---------------|---------------|-------------|-------------------------|-----------|-----------|
|               |               |             | X                       | Y         | Z         |
| 1             | 6             | 0           | -5.484423               | 1.212795  | 0.757061  |
| 2             | 6             | 0           | -4.112214               | 1.323847  | 0.633937  |
| 3             | 6             | 0           | -3.386147               | 0.393272  | -0.133103 |
| 4             | 6             | 0           | -4.077175               | -0.644199 | -0.768084 |
| 5             | 6             | 0           | -5.459500               | -0.762824 | -0.648981 |
| 6             | 6             | 0           | -6.167385               | 0.168802  | 0.116442  |
| 7             | 1             | 0           | -6.058512               | 1.922106  | 1.344283  |
| 8             | 1             | 0           | -3.583276               | 2.132296  | 1.129008  |
| 9             | 1             | 0           | -3.524114               | -1.364882 | -1.362654 |
| 10            | 1             | 0           | -5.966906               | -1.576888 | -1.153078 |
| 11            | 6             | 0           | -1.967630               | 0.507202  | -0.261401 |
| 12            | 6             | 0           | -0.764541               | 0.605998  | -0.369626 |
| 13            | 6             | 0           | 0.647141                | 0.714692  | -0.491679 |
| 14            | 6             | 0           | 1.358826                | 1.739792  | 0.138342  |
| 15            | 6             | 0           | 1.389447                | -0.224019 | -1.216183 |
| 16            | 6             | 0           | 2.739311                | 1.821756  | 0.057139  |
| 17            | 6             | 0           | 2.769523                | -0.148400 | -1.303486 |
| 18            | 6             | 0           | 3.462343                | 0.876821  | -0.664731 |
| 19            | 8             | 0           | -7.509603               | 0.146141  | 0.297334  |
| 20            | 6             | 0           | -8.246776               | -0.885450 | -0.328438 |
| 21            | 1             | 0           | -8.140522               | -0.839614 | -1.418632 |
| 22            | 1             | 0           | -7.928960               | -1.870864 | 0.031995  |
| 23            | 1             | 0           | -9.287941               | -0.716196 | -0.056219 |
| 24            | 9             | 0           | 0.706094                | 2.653723  | 0.857047  |
| 25            | 9             | 0           | 3.372757                | 2.804645  | 0.696153  |
| 26            | 9             | 0           | 0.764177                | -1.226308 | -1.831442 |
| 27            | 9             | 0           | 3.431023                | -1.069122 | -2.000628 |
| 28            | 6             | 0           | 1.711853                | -2.924415 | 0.755732  |
| 29            | 6             | 0           | 1.138557                | -1.959883 | 1.584284  |
| 30            | 6             | 0           | 1.948633                | -1.024207 | 2.229544  |
| 31            | 6             | 0           | 3.331584                | -1.055971 | 2.048245  |
| 32            | 6             | 0           | 3.905149                | -2.022442 | 1.220669  |
| 33            | 6             | 0           | 3.094962                | -2.955212 | 0.573522  |
| 34            | 1             | 0           | 1.080240                | -3.644248 | 0.243289  |
| 35            | 1             | 0           | 0.060281                | -1.926644 | 1.715978  |
| 36            | 1             | 0           | 1.500404                | -0.268144 | 2.869159  |
| 37            | 1             | 0           | 3.962766                | -0.322837 | 2.544443  |
| 38            | 1             | 0           | 4.981299                | -2.040660 | 1.072142  |
| 39            | 1             | 0           | 3.540244                | -3.699042 | -0.080774 |
| 40            | 17            | 0           | 5.175655                | 0.943078  | -0.724883 |

Excited State 1: Singlet-A 4.2411 eV 292.34 nm f=1.1705 <S\*\*2>=0.000  
HOMO -> LUMO 0.68730

• Geometry optimization of 4F-Br and benzene

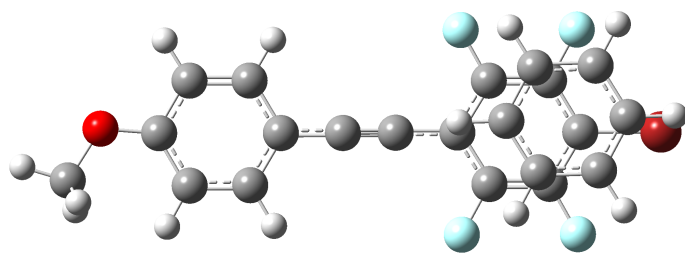

| Center Number | Atomic Number | Atomic Type | Coordinates (Angstroms) |           |           |
|---------------|---------------|-------------|-------------------------|-----------|-----------|
|               |               |             | X                       | Y         | Z         |
| 1             | 6             | 0           | 6.056547                | -1.350798 | 0.398535  |
| 2             | 6             | 0           | 4.682787                | -1.365306 | 0.247228  |
| 3             | 6             | 0           | 4.002019                | -0.219731 | -0.206205 |
| 4             | 6             | 0           | 4.739298                | 0.931759  | -0.501755 |
| 5             | 6             | 0           | 6.123439                | 0.954447  | -0.351425 |
| 6             | 6             | 0           | 6.786094                | -0.190790 | 0.100462  |
| 7             | 1             | 0           | 6.596269                | -2.225430 | 0.746715  |
| 8             | 1             | 0           | 4.117493                | -2.262958 | 0.477727  |
| 9             | 1             | 0           | 4.221124                | 1.818915  | -0.852655 |
| 10            | 1             | 0           | 6.667307                | 1.861361  | -0.588051 |
| 11            | 6             | 0           | 2.581739                | -0.233028 | -0.358967 |
| 12            | 6             | 0           | 1.376362                | -0.247241 | -0.482896 |
| 13            | 6             | 0           | -0.037354               | -0.259135 | -0.625387 |
| 14            | 6             | 0           | -0.794794               | -1.388190 | -0.298380 |
| 15            | 6             | 0           | -0.736875               | 0.871673  | -1.058521 |
| 16            | 6             | 0           | -2.174296               | -1.394369 | -0.413993 |
| 17            | 6             | 0           | -2.116408               | 0.871247  | -1.173693 |
| 18            | 6             | 0           | -2.852182               | -0.265310 | -0.858534 |
| 19            | 8             | 0           | 8.125899                | -0.276430 | 0.280648  |
| 20            | 6             | 0           | 8.909442                | 0.863590  | -0.011754 |
| 21            | 1             | 0           | 8.812776                | 1.147803  | -1.066179 |
| 22            | 1             | 0           | 8.626958                | 1.709667  | 0.625684  |
| 23            | 1             | 0           | 9.940281                | 0.579035  | 0.196086  |
| 24            | 9             | 0           | -0.185358               | -2.484513 | 0.153675  |
| 25            | 9             | 0           | -2.845337               | -2.496373 | -0.084437 |
| 26            | 9             | 0           | -0.070680               | 1.989292  | -1.350845 |
| 27            | 9             | 0           | -2.731012               | 1.978216  | -1.586117 |
| 28            | 6             | 0           | -2.080561               | 1.966293  | 1.952789  |
| 29            | 6             | 0           | -1.381087               | 0.840715  | 2.390361  |
| 30            | 6             | 0           | -2.073550               | -0.323516 | 2.725613  |
| 31            | 6             | 0           | -3.464225               | -0.364327 | 2.618570  |
| 32            | 6             | 0           | -4.161752               | 0.761657  | 2.181621  |
| 33            | 6             | 0           | -3.471106               | 1.926426  | 1.846473  |
| 34            | 1             | 0           | -1.540918               | 2.871327  | 1.685732  |
| 35            | 1             | 0           | -0.296810               | 0.868529  | 2.463475  |
| 36            | 1             | 0           | -1.528377               | -1.201861 | 3.061650  |
| 37            | 1             | 0           | -4.002235               | -1.273967 | 2.870356  |
| 38            | 1             | 0           | -5.243546               | 0.727542  | 2.090166  |
| 39            | 1             | 0           | -4.014575               | 2.799910  | 1.497380  |
| 40            | 35            | 0           | -4.695791               | -0.297270 | -1.096132 |

Excited State 1: Singlet-A 4.2271 eV 293.31 nm f=1.2632 <S\*\*2>=0.000  
HOMO -> LUMO 0.68679

• Geometry optimization of 4F-I and benzene

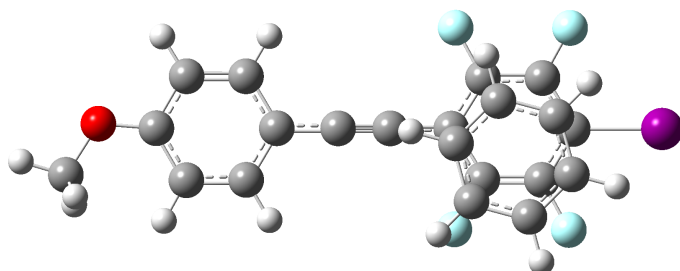

| Center Number | Atomic Number | Atomic Type | Coordinates (Angstroms) |           |           |
|---------------|---------------|-------------|-------------------------|-----------|-----------|
|               |               |             | X                       | Y         | Z         |
| 1             | 6             | 0           | 6.318385                | -1.289798 | 0.771223  |
| 2             | 6             | 0           | 4.939208                | -1.346804 | 0.697590  |
| 3             | 6             | 0           | 4.230378                | -0.454773 | -0.129213 |
| 4             | 6             | 0           | 4.945870                | 0.488723  | -0.874450 |
| 5             | 6             | 0           | 6.335361                | 0.552222  | -0.806032 |
| 6             | 6             | 0           | 7.025916                | -0.339907 | 0.020042  |
| 7             | 1             | 0           | 6.879255                | -1.970239 | 1.403439  |
| 8             | 1             | 0           | 4.391435                | -2.082519 | 1.278005  |
| 9             | 1             | 0           | 4.406231                | 1.178939  | -1.515448 |
| 10            | 1             | 0           | 6.861414                | 1.293698  | -1.395559 |
| 11            | 6             | 0           | 2.805076                | -0.511835 | -0.206115 |
| 12            | 6             | 0           | 1.595833                | -0.560517 | -0.270084 |
| 13            | 6             | 0           | 0.177719                | -0.607636 | -0.343008 |
| 14            | 6             | 0           | -0.562236               | -1.549625 | 0.376861  |
| 15            | 6             | 0           | -0.541287               | 0.312015  | -1.113062 |
| 16            | 6             | 0           | -1.947625               | -1.567063 | 0.335659  |
| 17            | 6             | 0           | -1.926037               | 0.295899  | -1.154703 |
| 18            | 6             | 0           | -2.649948               | -0.644335 | -0.429903 |
| 19            | 8             | 0           | 8.372773                | -0.364067 | 0.160144  |
| 20            | 6             | 0           | 9.133783                | 0.571929  | -0.576572 |
| 21            | 1             | 0           | 8.990707                | 0.434523  | -1.654867 |
| 22            | 1             | 0           | 8.871346                | 1.599402  | -0.298146 |
| 23            | 1             | 0           | 10.174878               | 0.379506  | -0.319814 |
| 24            | 9             | 0           | 0.068289                | -2.442201 | 1.140994  |
| 25            | 9             | 0           | -2.595183               | -2.477280 | 1.065866  |
| 26            | 9             | 0           | 0.111523                | 1.236166  | -1.816230 |
| 27            | 9             | 0           | -2.552141               | 1.206646  | -1.899925 |
| 28            | 53            | 0           | -4.733981               | -0.615364 | -0.429978 |
| 29            | 6             | 0           | -1.809223               | 3.287408  | 0.495811  |
| 30            | 6             | 0           | -0.464658               | 3.046745  | 0.781342  |
| 31            | 6             | 0           | -0.113072               | 2.066652  | 1.709690  |
| 32            | 6             | 0           | -1.106752               | 1.326538  | 2.352379  |
| 33            | 6             | 0           | -2.451131               | 1.569639  | 2.069214  |
| 34            | 6             | 0           | -2.802662               | 2.550929  | 1.141209  |
| 35            | 1             | 0           | -2.082557               | 4.041789  | -0.236101 |
| 36            | 1             | 0           | 0.308938                | 3.613087  | 0.271128  |
| 37            | 1             | 0           | 0.934230                | 1.869399  | 1.921948  |
| 38            | 1             | 0           | -0.832335               | 0.558570  | 3.070840  |
| 39            | 1             | 0           | -3.225217               | 0.989660  | 2.565554  |
| 40            | 1             | 0           | -3.849314               | 2.732607  | 0.913104  |

Excited State 1: Singlet-A 4.2106 eV 294.46 nm f=1.2375 <S\*\*2>=0.000  
HOMO -> LUMO 0.68444
